# Supplementary material for: RNApdbee—a webserver to derive secondary structures from pdb files of knotted and unknotted RNAs
Source: PubMed Central journal article supplement — Nucleic Acids Res. 2014 Apr 25;42(Web Server issue):W368–72. doi: 10.1093/nar/gku330 (PMC4086112; doi:10.1093/nar/gku330), 2014-04-25

## SUPPLEMENTARY MATERIAL

### **RNApdbee – a webserver to derive secondary structures from pdb files of knotted and unknotted RNAs**

Maciej Antczak<sup>1</sup>, Tomasz Zok<sup>1</sup>, Mariusz Popena<sup>2</sup>, Piotr Lukasiak<sup>1,2</sup>, Ryszard W. Adamiak<sup>1,2</sup>, Jacek Blazewicz<sup>1,2</sup> and Marta Szachniuk<sup>1,2\*</sup>

<sup>1</sup>Institute of Computing Science, Poznan University of Technology, Piotrowo 2, 60-965 Poznan, Poland

<sup>2</sup>Institute of Bioorganic Chemistry, Polish Academy of Sciences, Noskowskiego 12/14, 61-704 Poznan, Poland

**WEB SITE:** <http://rnapdbee.cs.put.poznan.pl>

## TABLE OF CONTENTS

|                                                                                                                                                                                                                                                                                                                                                                                                                                                        |           |
|--------------------------------------------------------------------------------------------------------------------------------------------------------------------------------------------------------------------------------------------------------------------------------------------------------------------------------------------------------------------------------------------------------------------------------------------------------|-----------|
| <b>Table S1.</b> The major features of RNAView, MC-Annotate and 3DNA/DSSR annotation programs.....                                                                                                                                                                                                                                                                                                                                                     | <b>3</b>  |
| <b>Figure S1.</b> The RNApdbee interface snapshots: front page with active 3D tab (panel A); front page for 3D scenario with 1DDY.pdb uploaded (panel B); front page for 2D scenario (panel C); output secondary structure topology derived for 1DDY (panel D).....                                                                                                                                                                                    | <b>4</b>  |
| <b>Figure S2.</b> The secondary structure topology of unknotted RNA signal recognition particle (3NDB) provided by RNApdbee in dot-bracket and graphical form. ....                                                                                                                                                                                                                                                                                    | <b>5</b>  |
| <b>Figure S3.</b> The secondary structure topology of 30S ribosome unit from <i>E. coli</i> (1PNX) provided by RNApdbee in extended dot-bracket and graphical form (the first order pseudoknot is shown in dark green). ....                                                                                                                                                                                                                           | <b>6</b>  |
| <b>Figure S4.</b> The secondary structure topology of bacterial RNase P (3DHS) provided by RNApdbee in extended dot-bracket and graphical form (the first and second order pseudoknots are shown in dark green and navy blue, respectively). ....                                                                                                                                                                                                      | <b>7</b>  |
| <b>Figure S5.</b> The secondary structure topology of group IIC intron (4FAU) provided by RNApdbee in extended dot-bracket and graphical form (the first, second and third order pseudoknots are shown in dark green, navy blue and red, respectively). ....                                                                                                                                                                                           | <b>7</b>  |
| <b>Figure S6.</b> The secondary structure topology of group IIC intron (3BWP) provided by RNApdbee in extended dot-bracket and graphical form (the first, second, third and fourth order pseudoknots are shown in dark green, navy blue, red and violet, respectively). ....                                                                                                                                                                           | <b>8</b>  |
| <b>Table S2.</b> Secondary structures of tRNA provided by RNApdbee, based on base-pairs list identified by RNAView, presented in extended dot-bracket notation. ....                                                                                                                                                                                                                                                                                   | <b>10</b> |
| <b>Table S3.</b> Secondary structures of tRNA provided by RNApdbee, based on base-pairs list identified by MC-Annotate, presented in extended dot-bracket notation. ....                                                                                                                                                                                                                                                                               | <b>11</b> |
| <b>Table S4.</b> Secondary structures of tRNA provided by RNApdbee, based on base-pairs list identified by 3DNA/DSSR without ‘Analyse helices’ option enabled, presented in extended dot-bracket notation.....                                                                                                                                                                                                                                         | <b>12</b> |
| <b>Table S5.</b> Secondary structures of tRNA provided by RNApdbee, based on base-pairs list identified by 3DNA/DSSR with ‘Analyse helices’ option disabled, presented in extended dot-bracket notation. ....                                                                                                                                                                                                                                          | <b>13</b> |
| <b>Figure S7.</b> The secondary structures and their visualisations obtained for the 23S rRNA (1FFK large subunit) obtained by RNApdbee based on 3DNA/DSSR base-pairs list with ‘Analyse helices’ option disabled (this page) or enabled (page 15). It was possible to encode in dot-bracket notation as much as 55% of non-canonical interactions identified in helical regions of considered structure. ....                                         | <b>14</b> |
| <b>Figure S8.</b> The secondary structure of a riboswitch (4LVV) and its visualization made by RNApdbee (3DNA/DSSR used as a base-pair analyzer) with ‘Analyse helices’ option disabled (left) or enabled (right). Differences between secondary structures are caused by regions observed as loops or junctions when canonical base-pairs were considered only, and modified when non-canonical interactions were also taken into consideration. .... | <b>16</b> |

**Table S1.** The major features of RNAView, MC-Annotate and 3DNA/DSSR annotation programs.

| <b>RNAView</b>                                                                                                                 | <b>MC-Annotate</b>                                                                                                                                                                                                                                                                                                                                                           | <b>3DNA/DSSR</b>                                                                                                                                                          |
|--------------------------------------------------------------------------------------------------------------------------------|------------------------------------------------------------------------------------------------------------------------------------------------------------------------------------------------------------------------------------------------------------------------------------------------------------------------------------------------------------------------------|---------------------------------------------------------------------------------------------------------------------------------------------------------------------------|
| identifies and classifies the types of base pairs and basic RNA motifs such as loops, bulges that are formed in RNA structures | provides a structural graph which encodes geometric information based on atom coordinates and torsion angles                                                                                                                                                                                                                                                                 | identifies bps covering typical and modified bases that form canonical and non-canonical pairs with at least one H-bond and non-pairing interactions (e.g. base stacking) |
| provides the implementation of edge-to-edge hydrogen bonding interactions according to Leontis/Westhof nomenclature            | structural graph is built taking into consideration: <ol style="list-style-type: none"> <li>1. every nucleotide residue conformation (based on sugar puckering modes and nitrogen base orientation around the N-glycosyl bond)</li> <li>2. base-base interactions (including stacking and hydrogen bonding)</li> <li>3. pseudoknots identified in input structure</li> </ol> | characterizes base pairs using both Leontis/Westhof and Saenger nomenclature                                                                                              |
| identifies tertiary interactions and generates 2D diagrams of RNA secondary structure in Postscript, VRML or RNAML formats     |                                                                                                                                                                                                                                                                                                                                                                              | detects triplets, higher-order base associations and pseudoknots                                                                                                          |
|                                                                                                                                |                                                                                                                                                                                                                                                                                                                                                                              | provides RNA secondary structure in the dot-bracket notation                                                                                                              |

**Figure S1.** The RNApdbee interface snapshots: front page with active 3D tab (panel A); front page for 3D scenario with 1DDY.pdb uploaded (panel B); front page for 2D scenario (panel C); output secondary structure topology derived for 1DDY (panel D).

**RNApdbee**  
RNA secondary structure extraction from PDB files

Home  
Help  
About  
Citations  
Links  
Contact Us

Welcome to RNApdbee, a webserver to derive secondary structures from pdb files of knotted and

RNApdbee runs according to the following scenarios:  
 ◦ in "3D → (...)" the secondary structure is derived from the PDB file  
 ◦ in "2D → (...)" the secondary structure is derived from the bpseq/CT file  
 In both scenarios, the resulting secondary structure is displayed in the 3D viewer

**1) Upload RNA pdb file:**  
 - from PDB: PDB id:  Get  
 - from local disk: Browse...  
 - from example: 1 2 3 4  
 Hide file contents Reset Data uploaded from: 1DDY.pdb

**2) Identify base-pairs using:**  
 RNAView  
 MC-Annotate  
 3DNA/DSSR  Analyse helices

**3) Generate graphical image using (Note):**  
 PseudoViewer-based procedure  
 VARNA-based procedure  
 No image

**4) Run**

**1) Upload RNA base-pair list:**  
 - from local file (BPSEQ/CT): Browse...  
 - from BPSEQ example: 1 2 3  
 - from CT example: 1 2 3  
 Show file contents Reset Data uploaded from: 1DDY-2D-bpseq.txt

**2) Generate graphical image using (Note):**  
 PseudoViewer-based procedure  
 VARNA-based procedure  
 No image

**3) Run**

**Output secondary structure topology:**

```

>strand_A
GGAACCGGUGGCGCAUAACCACCUCAGUGCGAGCAA
.....(((.[[.....[[]])...]-.]).]..
>strand_C
GGAACCGGUGGCGCAUAACCACCUCAGUGCGAGCAA
.....(((.[[.....[[]])...]-.]).]..
>strand_E
GGAACCGGUGGCGCAUAACCACCUCAGUGCGAGCAA
.....(((.[[.....[[]])...]-.]).]..
>strand_G
GGAACCGGUGGCGCAUAACCACCUCAGUGCGAGCAA
.....(((.[[.....[[]])...]-.]).]..
    
```

The interface also displays the PDB header information for 1DDY.pdb:

```

HEADER RNA 12-NOV-99 1DDY
TITLE MOLECULAR RECOGNITION BY THE VITAMIN B12 RNA APTAMER
CAVEAT 1DDY 6 C3' ATOMS HAVE INCORRECT CHIRALITY
COMPND MOL_ID: 1;
COMPND 2 MOLECULE: VITAMIN B12 BINDING RNA;
COMPND 3 CHAIN: A, C, E, G;
COMPND 4 ENGINEERED: YES;
COMPND 5 OTHER_DETAILS: COMPLEXED WITH COBALAMIN, VITAMIN
B12
SOURCE MOL_ID: 1;
SOURCE 2 SYNTHETIC: YES;
    
```

Panel A shows the main interface with the 3D tab active. Panel B shows the 3D scenario selected and 1DDY.pdb uploaded. Panel C shows the 2D scenario selected. Panel D shows the output secondary structure topology and a 3D visualization of the RNA structure.

**Figure S2.** The secondary structure topology of unknotted RNA signal recognition particle (3NDB) provided by RNApdbee in dot-bracket and graphical form.

>strand\_M

```

GUCUCGUCCCUGGGGCUCCGGCGGUGGGGGAGCAUCUCCUGUAGGGGAGAUGUAACCCCC
UUUACCUGCCGAACCCCGCCAGGCCCGGAAGGGAGCAACGGUAGGCAGGACGUCGGCGCU
CACGGGGUGCGGGAC
.(((...(((.....))))))
.....((((.....))))))
))))).....))

```

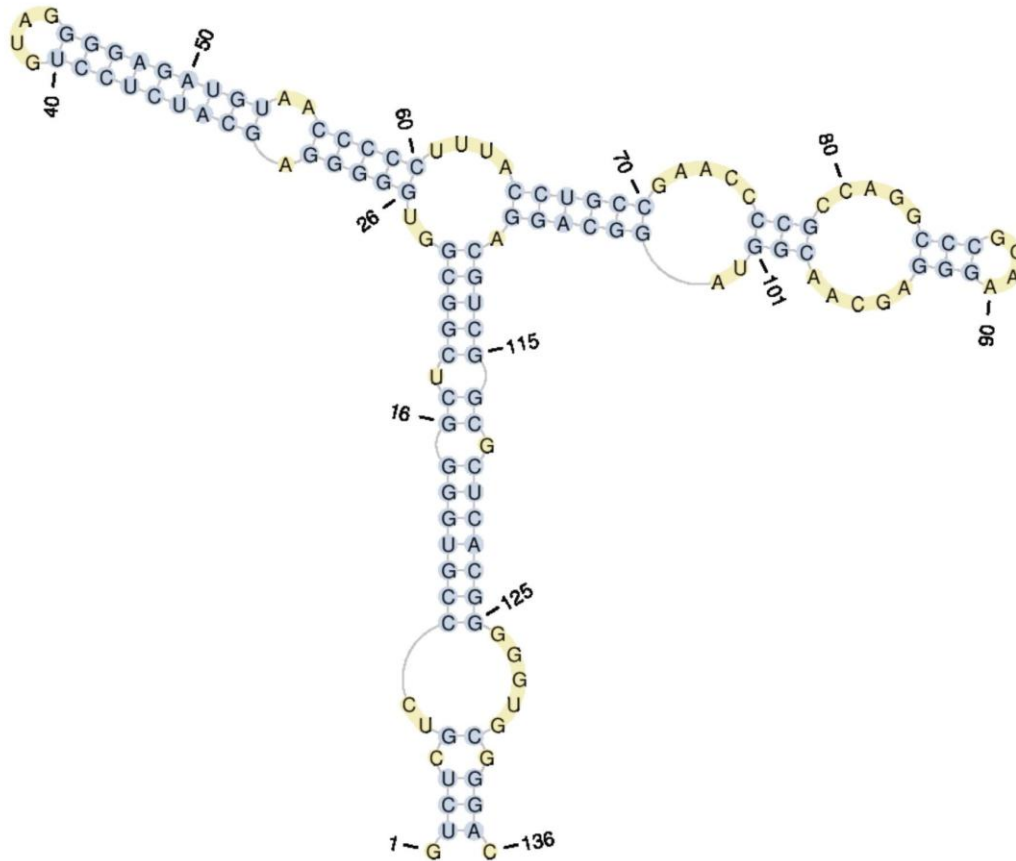



**Figure S4.** The secondary structure topology of bacterial RNase P (3DHS) provided by RNAppdb in extended dot-bracket and graphical form (the first and second order pseudoknots are shown in dark green and navy blue, respectively).

```
>strand A
GUUAAUCAUGCUCGGGUAUUCGUCGGCCGGUUUCGGCCGUAGAGGAAAGUCCAUGCUCGCACGGUGCUGAGAUGCCCGUA
GUGUUCGUGGAAACACGAGCGAGAAACCCAAAUGAUGGUAGGGGCACCUUCCCGAAGGAAAUGAACGGAGGGAAGGACAGGC
GGCGCAUGCAGCCUGUAGAUAGAUAUACCGCCGGAGUACGAGGCGCAAAGCCGCUUGCAGUACGAAGGUACAGAACAUGG
CUUAUAGAGCAUGAUUAACGUC
... (((... (((((( ((((((( (.....) )))))))) .{ ... [[. [[[[[ ((((((( (.....) )))))-
-----) )))) ... (((.....) )))) ... ((((((( (.....) )))))) (((((((
.....) )))) .....) )))) .{ .....) )) .{ .....] ] ] ] ]
11..).))).....)---
```

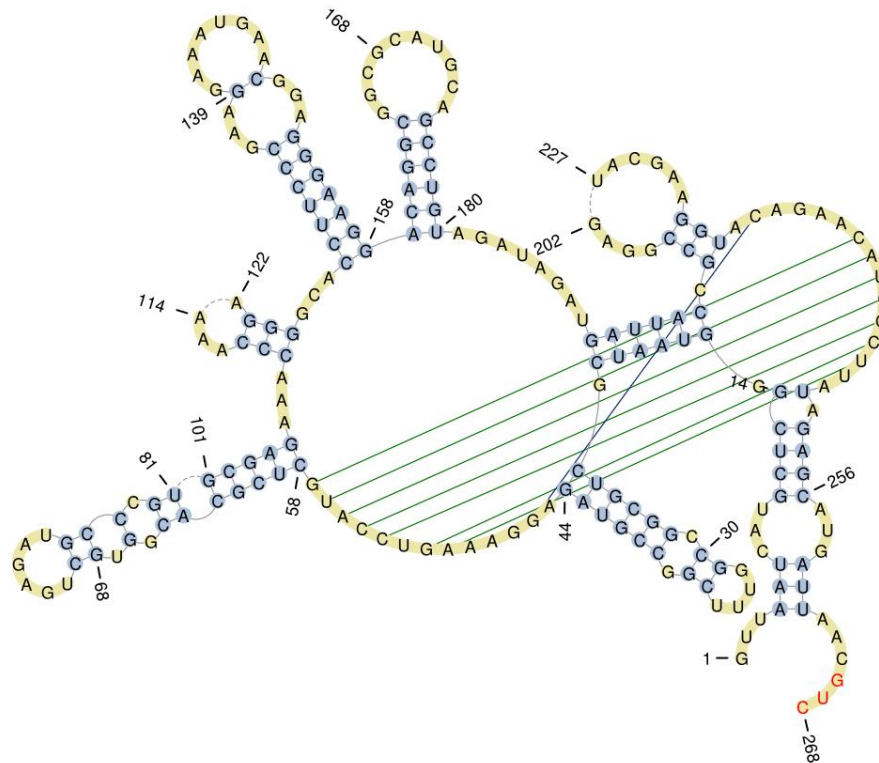





**Figure S6.** The secondary structure topology of group IIC intron (3BWP) provided by RNAPdbee in extended dot-bracket and graphical form (the first, second, third and fourth order pseudoknots are shown in dark green, navy blue, red and violet, respectively).

```
>strand_A
GUGUGCCCGGCAUGGGUGCAGUCUAUAGGGUGAGAGUCCCGAACUGUGAAGGCAGAAGUAACAGUUAGCCUAACGCAAGGGUG
UCCGUGGCGACAUGGAAUCUGAAGGAAGCGGACGGCAAACCUUCGGUCUGAGGAACACGAACUUCAUAUGAGGCUAGGUAUCA
AUGGAUGAGUUUGCAUAAACAAAACAAAGUCCUUCUGCCAAAGUUGGUACAGAGUAAAUGAAGCAGAUUGAUGAAGGGAAAAGA
CUGCAUUCUUACCCGGGAGGUCUGGAAACAGAAGUCAGCAGAAGUCAUAGUACCCUGUUCGCAGGGGAAGGACGGAACAAGU
AUGGCGUUCGCGCCUAGCUUGAACCGCCGUAUACCGAACGGUACGUACGGUGGUGAGAGGAGUUCGCUCUCUACUCUAU
--[.{((((<..((((((.....)))..(((..A[[[[[[[...]]))..(((..(((..(((..
(((.....)))))))))>.{})..(((.....-(((.....-([...-----
(((.....(((.]-.)))..)))a]]]]].--))..-----)))))..)))))..))
)))))}.])))..(((.....)))..-----(((.....((-----))-.))..(((
.-(((.....)))..)))..(((.....)))..)))))..-----
```

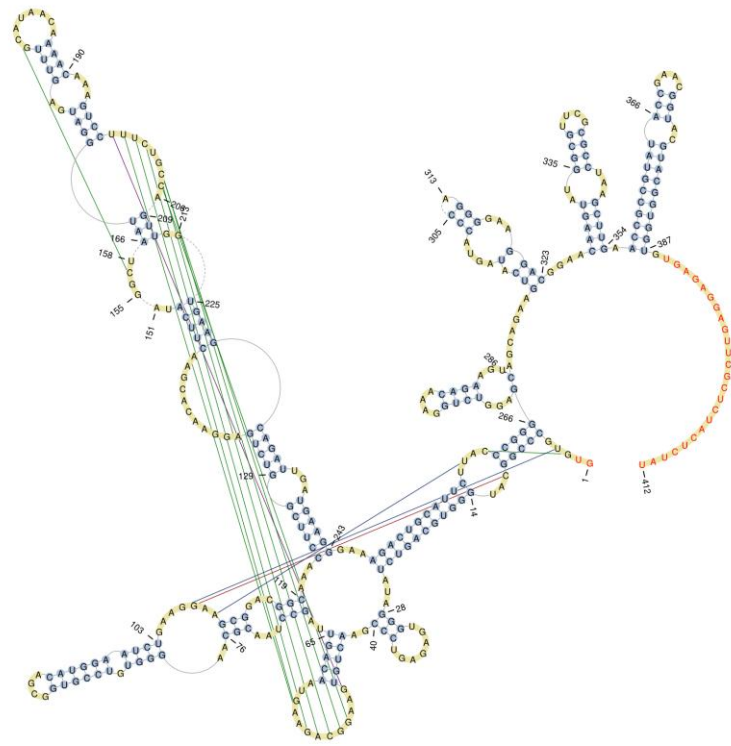

**Table S2.** Secondary structures of tRNA provided by RNApdbee, based on base-pairs list identified by RNAView, presented in extended dot-bracket notation.

|       | SEQ   | GCGGAUUUAGCUCAGUUGGGAGAGCGCCAGACUGAAGAUCUGGAGGUCCUGUGUUCGAUCCACAGAAUUCGCACCA |
|-------|-------|------------------------------------------------------------------------------|
| PDBId | Chain | Secondary structure                                                          |
| 1EHZ  | A     | (((((...(((.....[...]))).(((.....)))....((((...))....))))))))....            |
| 1EVV  | A     | (((((...(((.....[...]))).(((.....)))....((((...))....))))))))....            |
| 1FCW  | A     | (((((...(((.....[...]))).(((.....)))....((((...))....))))))))....            |
| 1FCW  | B     | (((((...(((.....[...]))).(((.....)))....((((...))....))))))))....            |
| 1FCW  | C     | (((((...(((.....[...]))).(((.....)))....((((...))....))))))))....            |
| 1FCW  | D     | (((((...(((.....[...]))).(((.....)))....((((...))....))))))))....            |
| 1FCW  | E     | (((((...(((.....[...]))).(((.....)))....((((...))....))))))))....            |
| 1GIX  | B     | (((((...(((.....[...]))).(((.....)))....((((...))....))))))))....            |
| 1GIX  | C     | ..(((...(((.....[...]))).(((.....)))....((((...))....))))))))....            |
| 1JGO  | B     | (((((...(((.....[...]))).(((.....)))....((((...))....))))))))....            |
| 1JGO  | C     | ..(((...(((.....[...]))).(((.....)))....((((...))....))))))))....            |
| 1JGP  | B     | (((((...(((.....[...]))).(((.....)))....((((...))....))))))))....            |
| 1JGP  | C     | ..(((...(((.....[...]))).(((.....)))....((((...))....))))))))....            |
| 1JGQ  | B     | (((((...(((.....[...]))).(((.....)))....((((...))....))))))))....            |
| 1JGQ  | C     | ..(((...(((.....[...]))).(((.....)))....((((...))....))))))))....            |
| 1MJ1  | C     | ..(((...(((.....[...]))).(((.....)))....((((...))....))))))))....            |
| 1MJ1  | D     | (((((...(((.....[...]))).(((.....)))....((((...))....))))))))....            |
| 1ML5  | B     | ..(((...(((.....[...]))).(((.....)))....((((...))....))))))))....            |
| 1PNS  | V     | ..(((...(((.....[...]))).(((.....)))....((((...))....))))))))....            |
| 1PNS  | W     | (((((...(((.....[...]))).(((.....)))....((((...))....))))))))....            |
| 1SZ1  | E     | (((((...(((.....[...]))).(((.....)))....((((...))....))))))))....            |
| 1SZ1  | F     | (((((...(((.....[...]))).(((.....)))....((((...))....))))))))....            |
| 1TN1  | A     | (((((...(((.....[...]))).(((.....)))....((((...))....))))))))....            |
| 1TN2  | A     | (((((...(((.....[...]))).(((.....)))....((((...))....))))))))....            |
| 1TRA  | A     | (((((...(((.....[...]))).(((.....)))....((((...))....))))))))....            |
| 1TTT  | D     | (((((...(((.....[...]))).(((.....)))....((((...))....))))))))....            |
| 1TTT  | E     | (((((...(((.....[...]))).(((.....)))....((((...))....))))))))....            |
| 1TTT  | F     | (((((...(((.....[...]))).(((.....)))....((((...))....))))))))....            |
| 1YL4  | B     | (..(.....(.....))....(.....(.....))....(.....(.....))....)                   |
| 1YL4  | C     | (..(.....(.....(.....)))....(.....(.....))....(.....(.....))....)            |
| 1ZO1  | F     | (.....(.....(.....))....(.....(.....))....(.....(.....))....)                |
| 1ZO3  | A     | (.....(.....(.....))....(.....(.....))....(.....(.....))....)                |
| 1ZO3  | B     | (.....(.....(.....))....(.....(.....))....(.....(.....))....)                |
| 2B64  | V     | (.....(.....(.....))....(.....(.....))....(.....(.....))....)                |
| 2B9M  | V     | (.....(.....(.....))....(.....(.....))....(.....(.....))....)                |
| 2B9O  | V     | (.....(.....(.....))....(.....(.....))....(.....(.....))....)                |
| 2GY9  | U     | (((((...(((.....[...]))).(((.....)))....((((...))....))))))))....            |
| 2GY9  | V     | (((((...(((.....[...]))).(((.....)))....((((...))....))))))))....            |
| 2GY9  | W     | (((((...(((.....[...]))).(((.....)))....((((...))....))))))))....            |
| 2GYB  | U     | (((((...(((.....[...]))).(((.....)))....((((...))....))))))))....            |
| 2GYB  | V     | (((((...(((.....[...]))).(((.....)))....((((...))....))))))))....            |
| 2GYB  | W     | (((((...(((.....[...]))).(((.....)))....((((...))....))))))))....            |
| 3DEG  | A     | (((((...(((.....[...]))).(((.....)))....((((...))....))))))))....            |
| 3E1A  | E     | ..(((...(((.....[...]))).(((.....)))....((((...))....))))))))....            |
| 3E1C  | E     | ..(((...(((.....[...]))).(((.....)))....((((...))....))))))))....            |
| 3FIH  | Y     | (((((...(((.....[...]))).(((.....)))....((((...))....))))))))....            |
| 3IZY  | N     | .....(.....(.....))....(.....(.....))....(.....(.....))....                  |
| 4TNA  | A     | (((((...(((.....[...]))).(((.....)))....((((...))....))))))))....            |
| 4TRA  | A     | (((((...(((.....[...]))).(((.....)))....((((...))....))))))))....            |
| 6TNA  | A     | (((((...(((.....[...]))).(((.....)))....((((...))....))))))))....            |

**Table S3.** Secondary structures of tRNA provided by RNAppdbee, based on base-pairs list identified by MC-Annotate, presented in extended dot-bracket notation.

|       | SEQ   | GCGGAUUUAGCUCAGUUGGGAGAGCGCCAGACUGAAGAUCUGGAGGUCCUGUGUUCGAUCCACAGAAUUCGCACCA |
|-------|-------|------------------------------------------------------------------------------|
| PDBId | Chain | Secondary structure                                                          |
| 1EHZ  | A     | (((((((.....[.....])..(((.....)).....((((.....]))).....)))))).....           |
| 1EVV  | A     | (((((((.....[.....])..(((.....)).....((((.....]))).....)))))).....           |
| 1FCW  | A     | (((((((.....[.....])..(((.....)).....((((.....]))).....)))))).....           |
| 1FCW  | B     | (((((((.....[.....])..(((.....)).....((((.....]))).....)))))).....           |
| 1FCW  | C     | (((((((.....[.....])..(((.....)).....((((.....]))).....)))))).....           |
| 1FCW  | D     | (((((((.....[.....])..(((.....)).....((((.....]))).....)))))).....           |
| 1FCW  | E     | (((((((.....[.....])..(((.....)).....((((.....]))).....)))))).....           |
| 1GIX  | B     | (((((((.....[.....])..(((.....)).....((((.....]))).....)))))).....           |
| 1GIX  | C     | .(((((((.....[.....])..(((.....)).....((((.....]))).....)))))).....          |
| 1JGO  | B     | (((((((.....[.....])..(((.....)).....((((.....]))).....)))))).....           |
| 1JGO  | C     | .(((((((.....[.....])..(((.....)).....((((.....]))).....)))))).....          |
| 1JGP  | B     | (((((((.....[.....])..(((.....)).....((((.....]))).....)))))).....           |
| 1JGP  | C     | .(((((((.....[.....])..(((.....)).....((((.....]))).....)))))).....          |
| 1JGQ  | B     | (((((((.....[.....])..(((.....)).....((((.....]))).....)))))).....           |
| 1JGQ  | C     | .(((((((.....[.....])..(((.....)).....((((.....]))).....)))))).....          |
| 1MJ1  | C     | .(((((((.....[.....])..(((.....)).....((((.....]))).....)))))).....          |
| 1MJ1  | D     | (((((((.....[.....])..(((.....)).....((((.....]))).....)))))).....           |
| 1ML5  | B     | .(((((((.....[.....])..(((.....)).....((((.....]))).....)))))).....          |
| 1PNS  | V     | .(((((((.....[.....])..(((.....)).....((((.....]))).....)))))).....          |
| 1PNS  | W     | (((((((.....[.....])..(((.....)).....((((.....]))).....)))))).....           |
| 1SZ1  | E     | .(((((((.....[.....])..(((.....)).....((((.....]))).....)))))).....          |
| 1SZ1  | F     | (((((((.....[.....])..(((.....)).....((((.....]))).....)))))).....           |
| 1TN1  | A     | (((((((.....[.....])..(((.....)).....((((.....]))).....)))))).....           |
| 1TN2  | A     | (((((((.....[.....])..(((.....)).....((((.....]))).....)))))).....           |
| 1TRA  | A     | (((((((.....[.....])..(((.....)).....((((.....]))).....)))))).....           |
| 1TTT  | D     | (((((((.....[.....])..(((.....)).....((((.....]))).....)))))).....           |
| 1TTT  | E     | (((((((.....[.....])..(((.....)).....((((.....]))).....)))))).....           |
| 1TTT  | F     | (((((((.....[.....])..(((.....)).....((((.....]))).....)))))).....           |
| 1YL4  | B     | ((.....((.....((.....)).....((.....)).....((.....)).....)).....)             |
| 1YL4  | C     | ((.....((.....((.....)).....((.....)).....((.....)).....)).....)             |
| 1ZO1  | F     | .(((((((.....[.....])..(((.....)).....((((.....]))).....)))))).....          |
| 1ZO3  | A     | .(((((((.....[.....])..(((.....)).....((((.....]))).....)))))).....          |
| 1ZO3  | B     | .(((((((.....[.....])..(((.....)).....((((.....]))).....)))))).....          |
| 2B64  | V     | .....((.....((.....)).....((.....)).....((.....)).....)                      |
| 2B9M  | V     | .....((.....((.....)).....((.....)).....((.....)).....)                      |
| 2B9O  | V     | .....((.....((.....)).....((.....)).....((.....)).....)                      |
| 2GY9  | U     | .(((((((.....[.....])..(((.....)).....((((.....]))).....)))))).....          |
| 2GY9  | V     | .(((((((.....[.....])..(((.....)).....((((.....]))).....)))))).....          |
| 2GY9  | W     | .(((((((.....[.....])..(((.....)).....((((.....]))).....)))))).....          |
| 2GYB  | U     | .(((((((.....[.....])..(((.....)).....((((.....]))).....)))))).....          |
| 2GYB  | V     | .(((((((.....[.....])..(((.....)).....((((.....]))).....)))))).....          |
| 2GYB  | W     | .(((((((.....[.....])..(((.....)).....((((.....]))).....)))))).....          |
| 3DEG  | A     | (((((((.....[.....])..(((.....)).....((((.....]))).....)))))).....           |
| 3E1A  | E     | .(((((((.....[.....])..(((.....)).....((((.....]))).....)))))).....          |
| 3E1C  | E     | .(((((((.....[.....])..(((.....)).....((((.....]))).....)))))).....          |
| 3FIH  | Y     | ((.....((.....((.....[.....])..(((.....)).....((((.....]))).....)))))).....  |
| 3IZY  | N     | .....((.....((.....)).....((.....)).....((.....)).....)                      |
| 4TNA  | A     | (((((((.....[.....])..(((.....)).....((((.....]))).....)))))).....           |
| 4TRA  | A     | (((((((.....[.....])..(((.....)).....((((.....]))).....)))))).....           |
| 6TNA  | A     | (((((((.....[.....])..(((.....)).....((((.....]))).....)))))).....           |

**Table S4.** Secondary structures of tRNA provided by RNAPdbec, based on base-pairs list identified by 3DNA/DSSR without ‘Analyse helices’ option enabled, presented in extended dot-bracket notation.

|       | SEQ   | GCGGAUUUAGCUCAGUUGGGAGAGCGCCAGACUGAAGAUCUGGAGGUCCUGUGUUCGAUCCACAGAAUUCGCACCA |
|-------|-------|------------------------------------------------------------------------------|
| PDBId | Chain | Secondary structure                                                          |
| 1EHZ  | A     | (((((((...(((.....[...]))).((((.....))))).....((((...]))))))))....           |
| 1EVV  | A     | (((((((...(((.....[...]))).((((.....))))).....((((...]))))))))....           |
| 1FCW  | A     | (((.....(((.....[...]))).((((.....))))).....((((...]))))))))....             |
| 1FCW  | B     | (((.....(((.....[...]))).((((.....))))).....((((...]))))))))....             |
| 1FCW  | C     | (((.....(((.....[...]))).((((.....))))).....((((...]))))))))....             |
| 1FCW  | D     | (((.....(((.....[...]))).((((.....))))).....((((...]))))))))....             |
| 1FCW  | E     | (((.....(((.....[...]))).((((.....))))).....((((...]))))))))....             |
| 1GIX  | B     | (((((((...(((.....[...]))).((((.....))))).....((((...]))))))))....           |
| 1GIX  | C     | .(((((((...(((.....[...]))).((((.....))))).....((((...]))))))))....          |
| 1JGO  | B     | (((((((...(((.....[...]))).((((.....))))).....((((...]))))))))....           |
| 1JGO  | C     | .(((((((...(((.....[...]))).((((.....))))).....((((...]))))))))....          |
| 1JGP  | B     | (((((((...(((.....[...]))).((((.....))))).....((((...]))))))))....           |
| 1JGP  | C     | .(((((((...(((.....[...]))).((((.....))))).....((((...]))))))))....          |
| 1JGQ  | B     | (((((((...(((.....[...]))).((((.....))))).....((((...]))))))))....           |
| 1JGQ  | C     | .(((((((...(((.....[...]))).((((.....))))).....((((...]))))))))....          |
| 1MJ1  | C     | .(((((((...(((.....[...]))).((((.....))))).....((((...]))))))))....          |
| 1MJ1  | D     | (((((((...(((.....[...]))).((((.....))))).....((((...]))))))))....           |
| 1ML5  | B     | .(((((((...(((.....[...]))).((((.....))))).....((((...]))))))))....          |
| 1PNS  | V     | .(((((((...(((.....[...]))).((((.....))))).....((((...]))))))))....          |
| 1PNS  | W     | (((((((...(((.....[...]))).((((.....))))).....((((...]))))))))....           |
| 1SZ1  | E     | (((((((...(((.....[...]))).((((.....))))).....((((...]))))))))....           |
| 1SZ1  | F     | (((((((...(((.....[...]))).((((.....))))).....((((...]))))))))....           |
| 1TN1  | A     | (((((((...(((.....[...]))).((((.....))))).....((((...]))))))))....           |
| 1TN2  | A     | (((((((...(((.....[...]))).((((.....))))).....((((...]))))))))....           |
| 1TRA  | A     | (((((((...(((.....[...]))).((((.....))))).....((((...]))))))))....           |
| 1TTT  | D     | (((((((...(((.....[...]))).((((.....))))).....((((...]))))))))....           |
| 1TTT  | E     | (((((((...(((.....[...]))).((((.....))))).....((((...]))))))))....           |
| 1TTT  | F     | (((((((...(((.....[...]))).((((.....))))).....((((...]))))))))....           |
| 1YL4  | B     | ((...(((.....[...]))).((((.....))))).....((((...]))))))))....                |
| 1YL4  | C     | ((...(((.....[...]))).((((.....))))).....((((...]))))))))....                |
| 1ZO1  | F     | (((((((...(((.....[...]))).((((.....))))).....((((...]))))))))....           |
| 1ZO3  | A     | (((((((...(((.....[...]))).((((.....))))).....((((...]))))))))....           |
| 1ZO3  | B     | (((((((...(((.....[...]))).((((.....))))).....((((...]))))))))....           |
| 2B64  | V     | ((...(((.....[...]))).((((.....))))).....((((...]))))))))....                |
| 2B9M  | V     | ((...(((.....[...]))).((((.....))))).....((((...]))))))))....                |
| 2B9O  | V     | ((...(((.....[...]))).((((.....))))).....((((...]))))))))....                |
| 2GY9  | U     | (((((((...(((.....[...]))).((((.....))))).....((((...]))))))))....           |
| 2GY9  | V     | (((((((...(((.....[...]))).((((.....))))).....((((...]))))))))....           |
| 2GY9  | W     | (((((((...(((.....[...]))).((((.....))))).....((((...]))))))))....           |
| 2GYB  | U     | .(((((((...(((.....[...]))).((((.....))))).....((((...]))))))))....          |
| 2GYB  | V     | .(((((((...(((.....[...]))).((((.....))))).....((((...]))))))))....          |
| 2GYB  | W     | .(((((((...(((.....[...]))).((((.....))))).....((((...]))))))))....          |
| 3DEG  | A     | (((((((...(((.....[...]))).((((.....))))).....((((...]))))))))....           |
| 3E1A  | E     | .(((((((...(((.....[...]))).((((.....))))).....((((...]))))))))....          |
| 3E1C  | E     | .(((((((...(((.....[...]))).((((.....))))).....((((...]))))))))....          |
| 3FIH  | Y     | (((((((...(((.....[...]))).((((.....))))).....((((...]))))))))....           |
| 3IZY  | N     | .....                                                                        |
| 4TNA  | A     | (((((((...(((.....[...]))).((((.....))))).....((((...]))))))))....           |
| 4TRA  | A     | (((.....(((.....[...]))).((((.....))))).....((((...]))))))))....             |
| 6TNA  | A     | (((((((...(((.....[...]))).((((.....))))).....((((...]))))))))....           |



**Figure S7.** The secondary structures and their visualisations obtained for the 23S rRNA (1FFK large subunit) obtained by RNAPdbee based on 3DNA/DSSR base-pairs list with ‘Analyse helices’ option disabled (this page) or enabled (page 15). It was possible to encode in dot-bracket notation as much as 55% of non-canonical interactions identified in helical regions of considered structure.

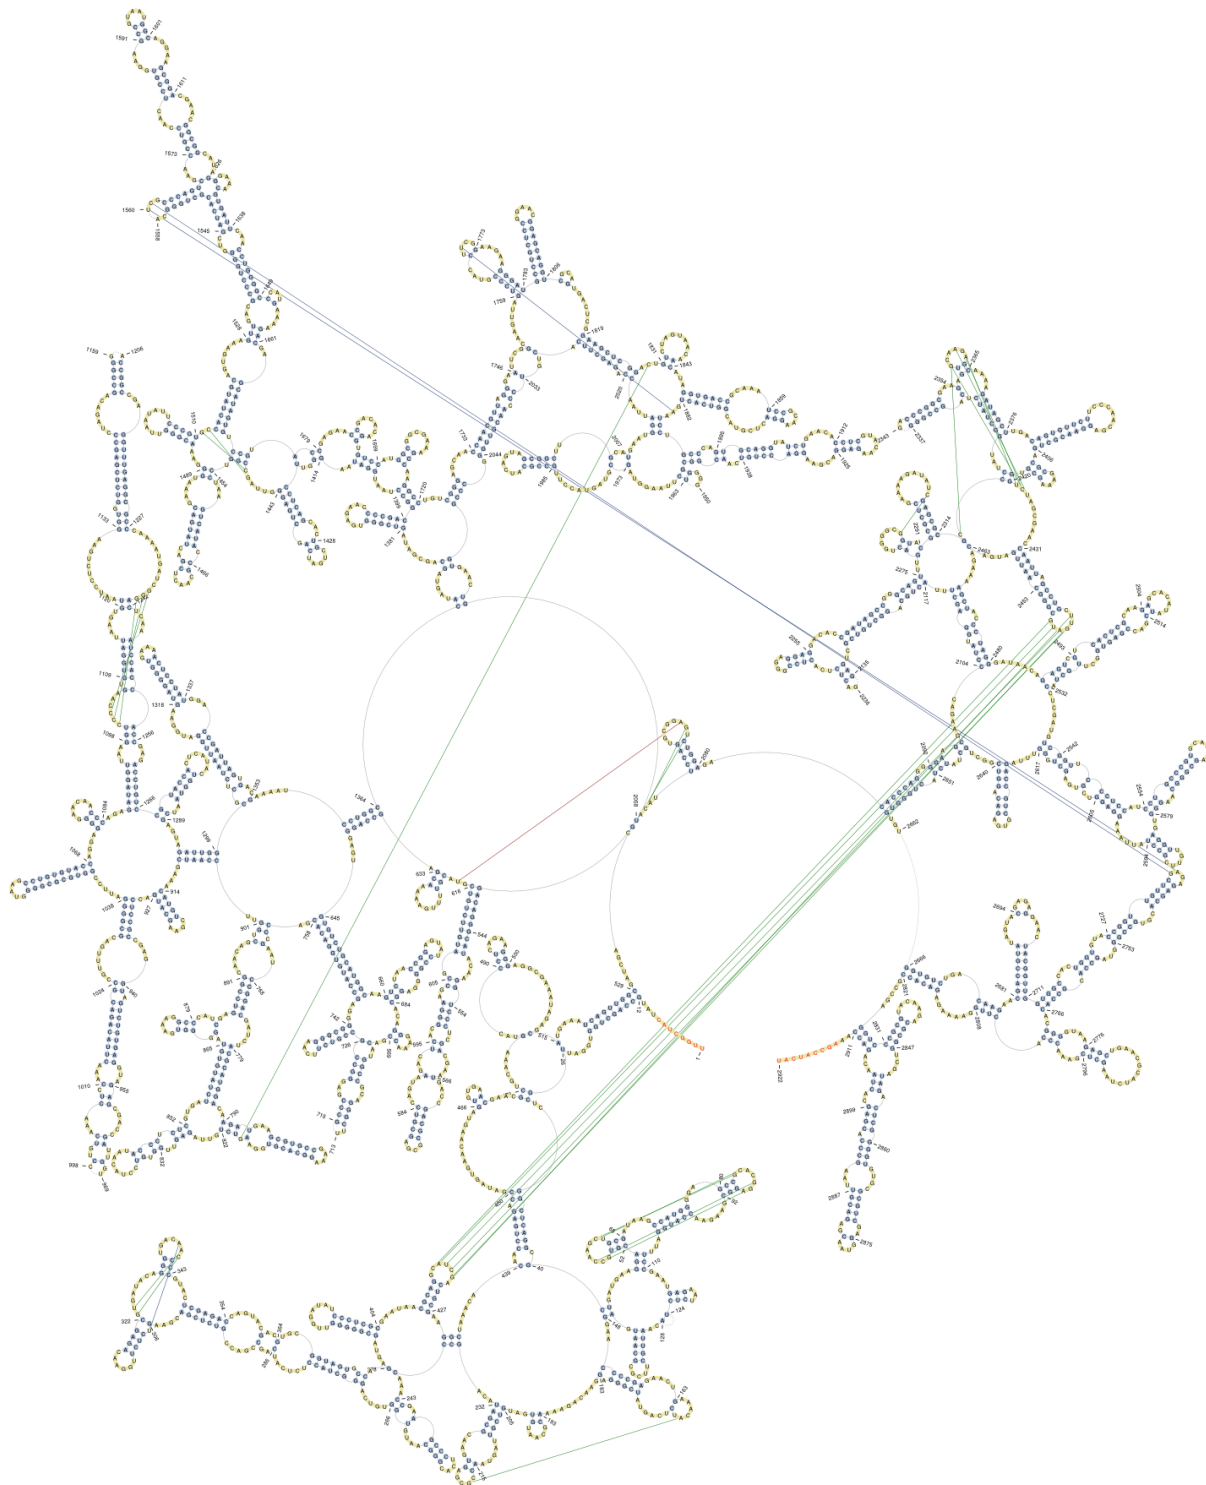

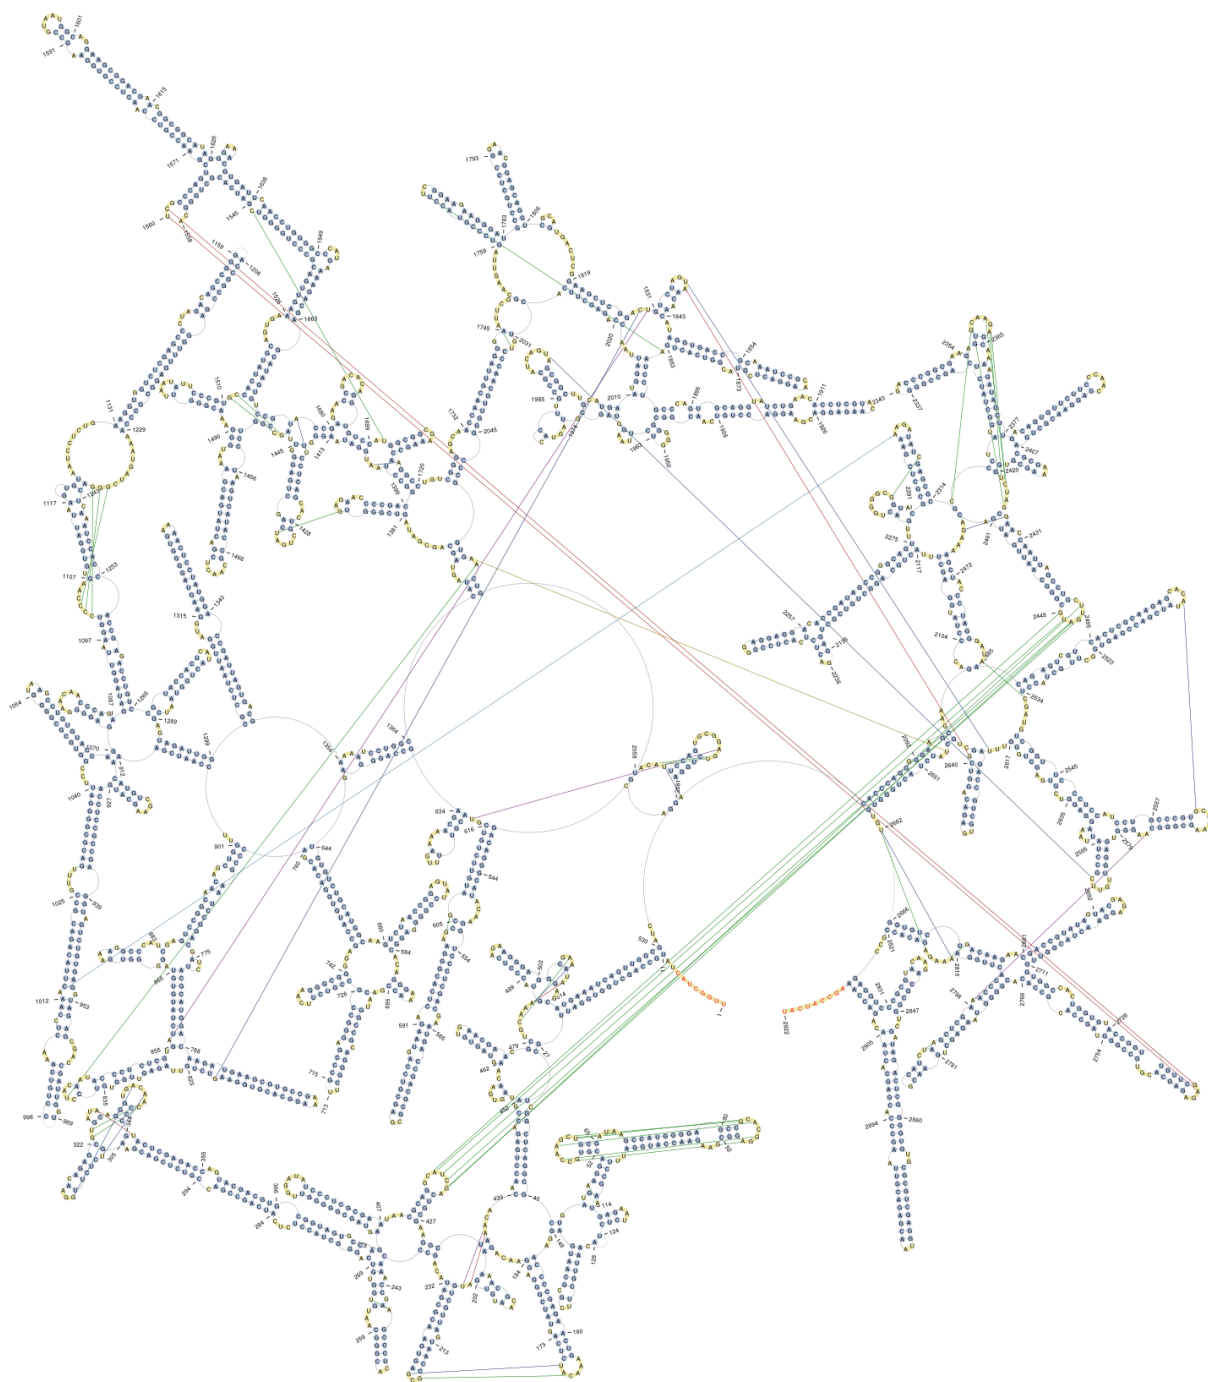

**Figure S8.** The secondary structure of a riboswitch (4LVV) and its visualization made by RNApdbee (3DNA/DSSR used as a base-pair analyzer) with ‘Analyse helices’ option disabled (left) or enabled (right). Differences between secondary structures are caused by regions observed as loops or junctions when canonical base-pairs were considered only, and modified when non-canonical interactions were also taken into consideration.

>strand\_A

```
GGAGAGUAGAUGAUUCGCGUUAA
GUGUGUGUGAAUGGGAUGUCGUC
ACACAACGAAGCGAGAGCGCGGU
GAAUCAUUGCAUCCGCUCCA
((((...((((((((((((...
...(((((((...[[[[[...))
))))...((...)))))..)
)))))))]]]])..)))).
```

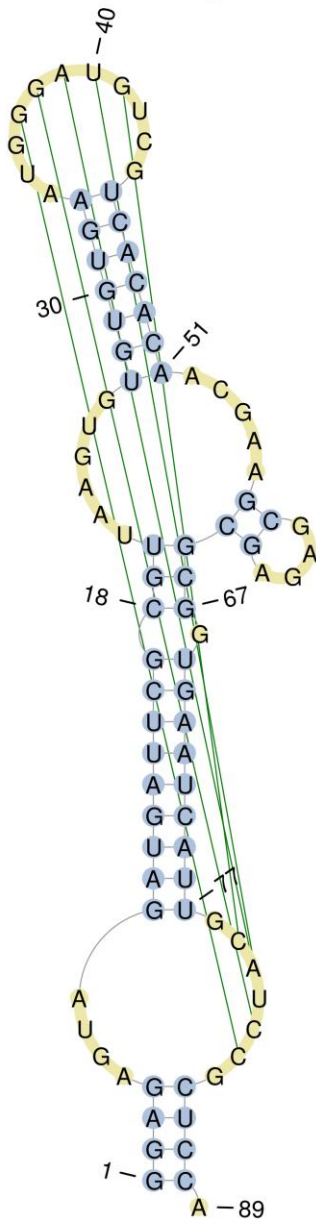

>strand\_A

```
GGAGAGUAGAUGAUUCGCGUUAA
GUGUGUGUGAAUGGGAUGUCGUC
ACACAACGAAGCGAGAGCGCGGU
GAAUCAUUGCAUCCGCUCCA
((((..((((((((((((..(
(.(((((((((((.[[[[.)))
))))))..)).((..)))))..)
)))))))]]]])..)))).
```

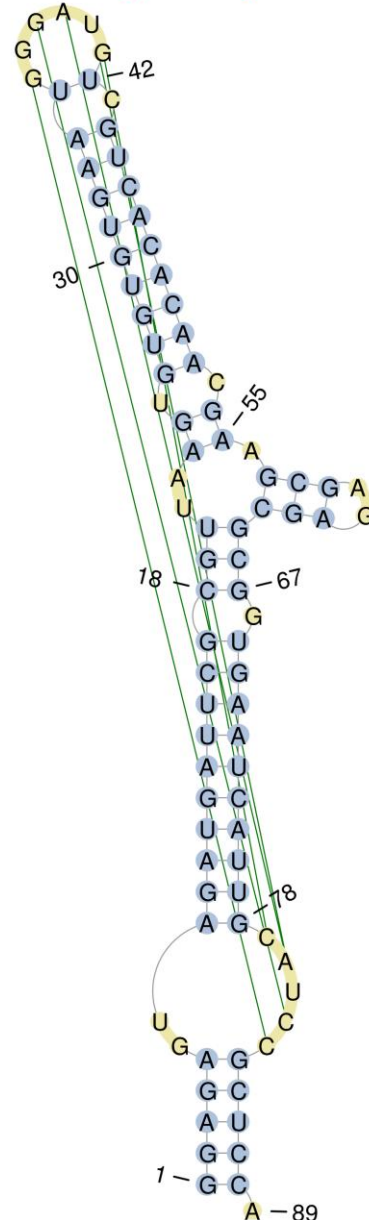

Supplement: supp_gku330_nar-00224-web-b-2014-File004.pdf [file supp_gku330_nar-00224-web-b-2014-File004.pdf]
